# Supplementary material for: Color tunable Ca8ZnM(PO4)7 (M = Lu/Tb, Lu/Eu, Tb/Eu) phosphors: luminescence, energy transfer and thermal stability studies for n-UV white LEDs
Source: Royal Society of Chemistry journal article supplement (doi:10.1039/d1dt01901e), 2021-01-01
Supplement: d1dt01901e1.pdf [file d1dt01901e1.pdf]

## Supporting Information

Color tunable  $\text{Ca}_8\text{ZnM}(\text{PO}_4)_7$  (M = Lu/Tb, Lu/Eu, Tb/Eu) phosphors: luminescence, energy transfer and thermal stability studies for n-UV white LEDs

Jing Yan<sup>a\*</sup>, Chunyan Jiang<sup>c</sup>, Yulun Xian<sup>a</sup>, Jianbang Zhou<sup>c</sup>, Hong Li<sup>a</sup>,  
Boqian Chen<sup>a</sup>, Jingchao Xing<sup>a</sup>, Zhitao Chen<sup>a</sup> and Junhao Li<sup>b\*</sup>

<sup>a</sup> Institute of Semiconductors, Guangdong Academy of Sciences, Guangzhou, 510651, PR China

<sup>b</sup> Guangdong Province Key Laboratory of Rare Earth Development and Application, Institute of Rare Metals, Guangdong Academy of Sciences, Guangzhou, 510651, PR China

<sup>c</sup> School of Marine Sciences, Sun Yat-Sen University, Zhuhai, 519082, PR China

\* Corresponding author.

E-mail address: [yanjing920@163.com](mailto:yanjing920@163.com); [lijunhao@irmgdas.gd.cn](mailto:lijunhao@irmgdas.gd.cn)

**Table S1** Structural parameters of CZLP, CZTP, CZTP:0.5Eu<sup>3+</sup> and CZEP at room temperature

| Material          | CZLP        | CZTP         | CZTP:0.5Eu <sup>3+</sup> | CZEP         |
|-------------------|-------------|--------------|--------------------------|--------------|
| Space group       | R3c         | R3c          | R3c                      | R3c          |
| Molecules (Z)     | 6           | 6            | 6                        | 6            |
| a, Å              | 10.357(39)  | 10.37348(29) | 10.37767(21)             | 10.37852(24) |
| c, Å              | 37.01(32)   | 37.12557(90) | 37.15141(93)             | 37.16041(81) |
| V, Å <sup>3</sup> | 3438.33(39) | 3459.81(21)  | 3465.02(17)              | 3466.43(17)  |
| Rwp, %            | 5.50        | 6.16         | 5.98                     | 8.21         |
| Rp, %             | 3.64        | 4.21         | 4.23                     | 5.35         |
| GOF               | 2.82        | 2.76         | 2.67                     | 3.36         |

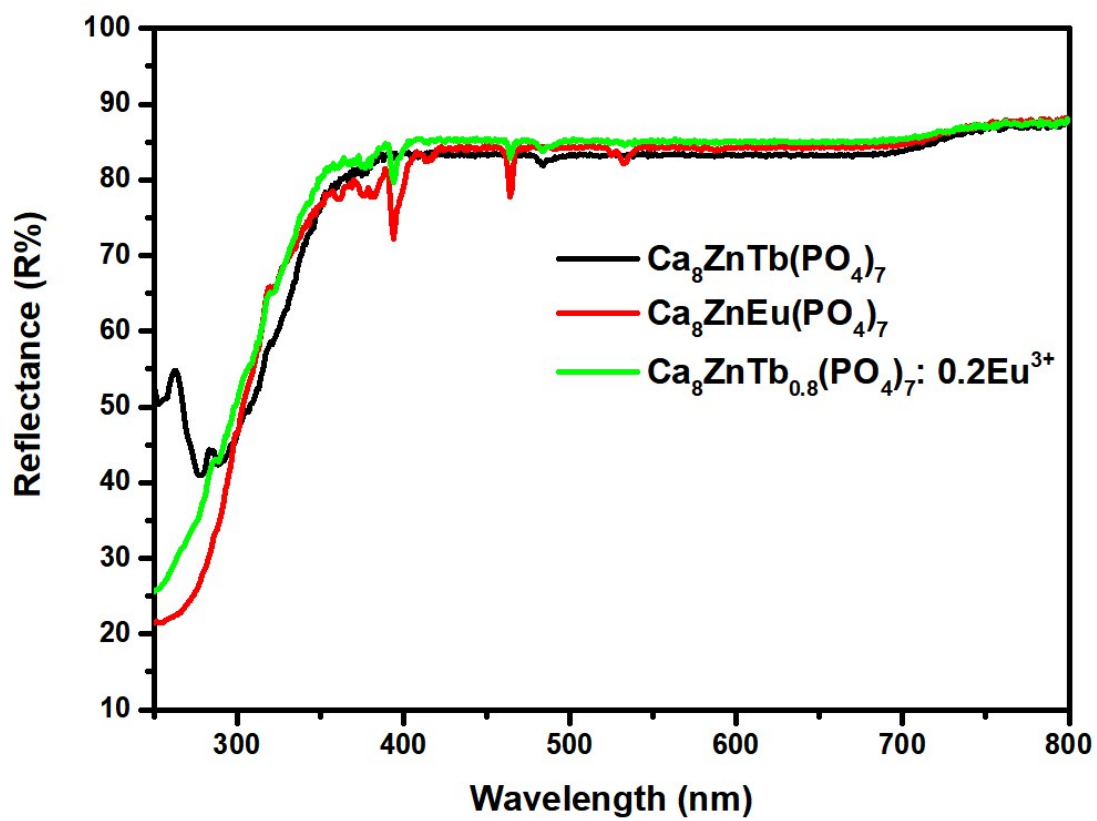

Fig. S1 Diffused reflectance spectra of CZTP, CZEP and CZTP: 0.2Eu<sup>3+</sup>

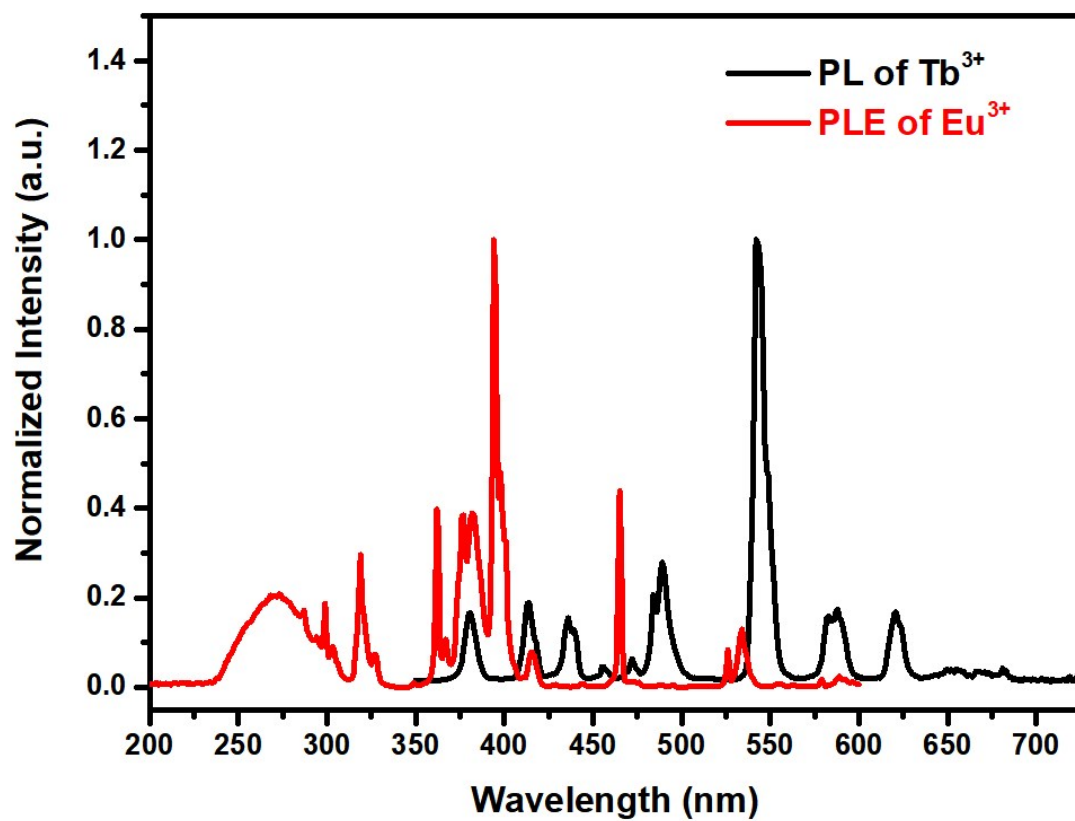

Fig. S2 Normalized emission spectrum CZLP: 0.1Tb<sup>3+</sup> of and excitation spectrum of CZEP

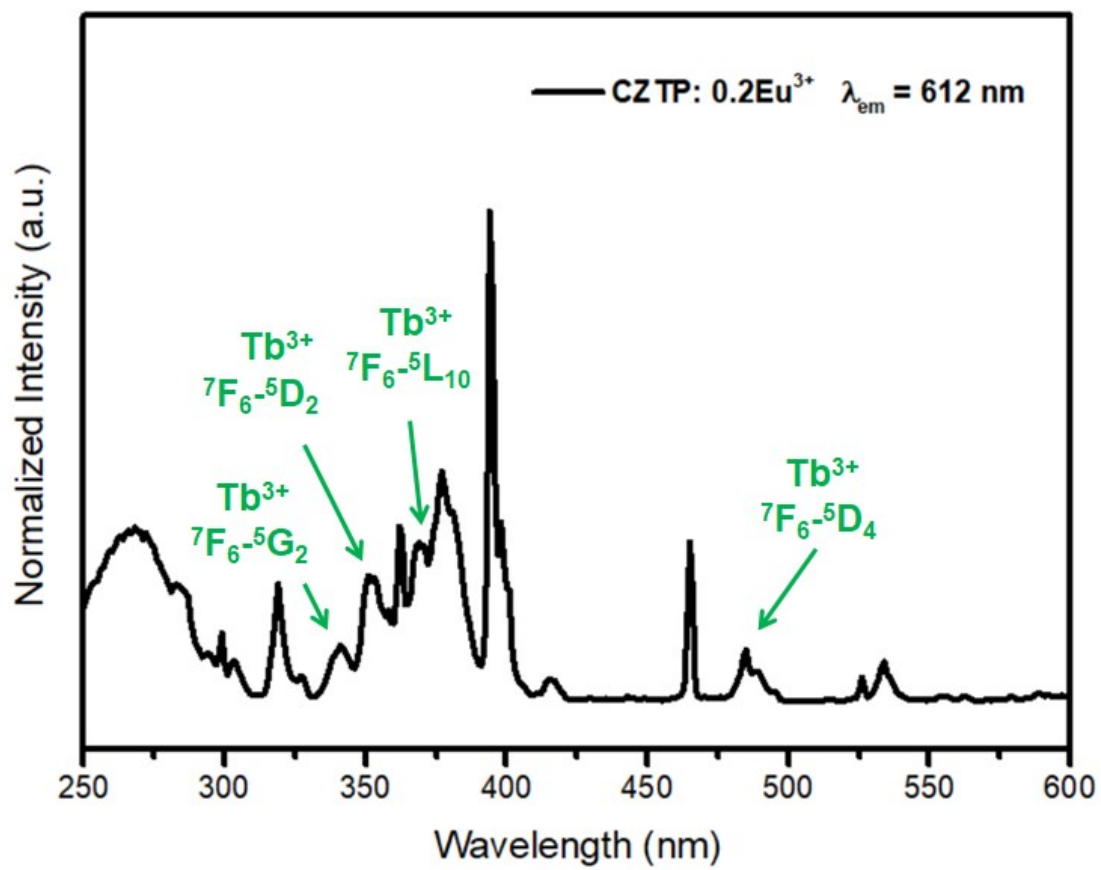

Fig. S3 The excitation spectrum of CZTP: 0.2Eu<sup>3+</sup> monitored at 612 nm

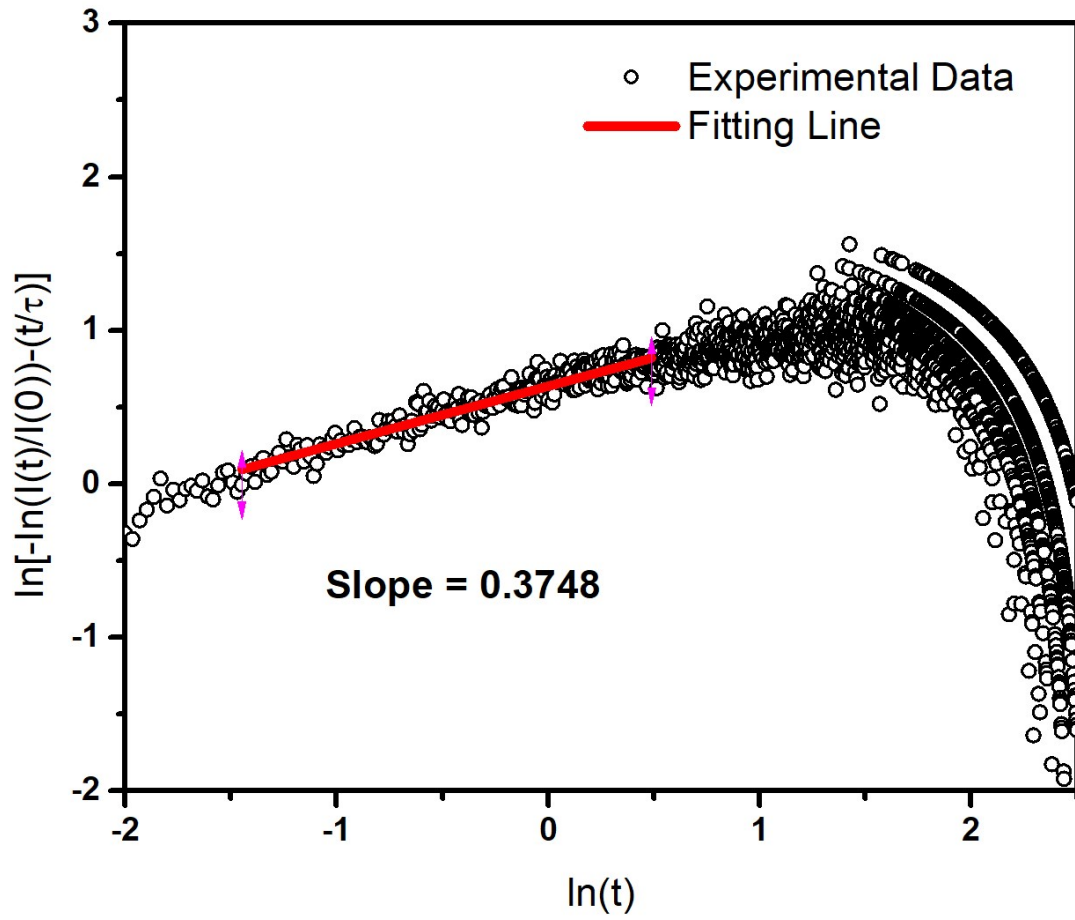

**Fig. S4** The fitting line of CZTP: 0.80Eu<sup>3+</sup> decay curve with Inokuti-Hirayama model

**Table S2** CIE coordinates of CZTP:0.2Eu<sup>3+</sup> from 300 to 500 K

| Temperature (K) | CIE (x, y)       |
|-----------------|------------------|
| 300             | (0.4854, 0.4718) |
| 325             | (0.4910, 0.4681) |
| 350             | (0.4954, 0.4647) |
| 375             | (0.4983, 0.4627) |
| 400             | (0.5010, 0.4608) |
| 425             | (0.5027, 0.4595) |
| 450             | (0.5047, 0.4581) |
| 475             | (0.5057, 0.4572) |
| 500             | (0.5063, 0.4566) |

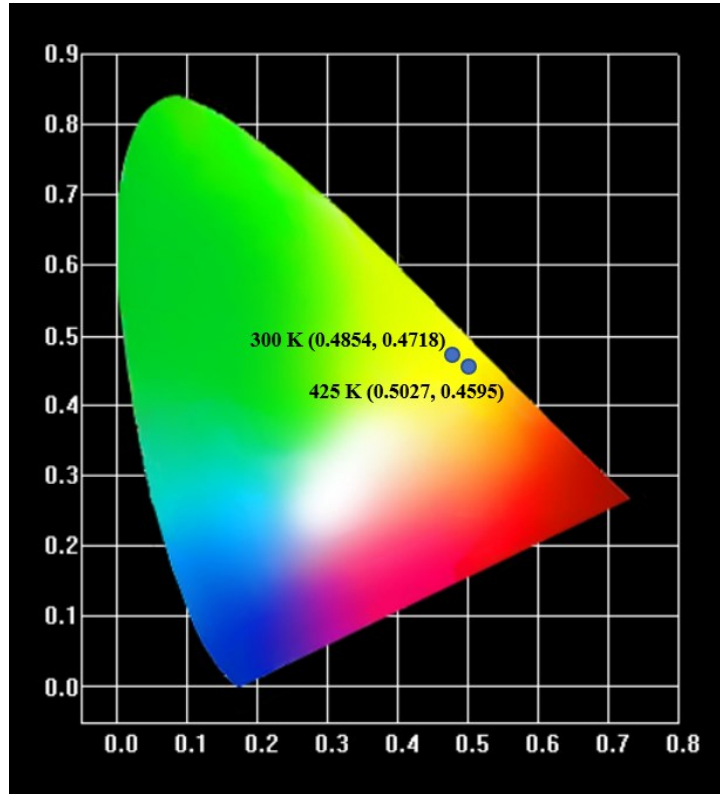

**Fig. S5** CIE diagram of CZTP:0.2Eu<sup>3+</sup> at 300 K and 425 K
